# Supplementary material
Source: PubMed Central journal article supplement (PMC7017651)

In the format provided by the authors and unedited.

**CORRECTION**

<https://doi.org/10.1038/s41586-019-1350-9>

## **Author Correction: L1 drives IFN in senescent cells and promotes age-associated inflammation**

Marco De Cecco, Takahiro Ito, Anna P. Petrashen, Amy E. Elias, Nicholas J. Skvir, Steven W. Criscione, Alberto Caligiana, Greta Broccoli, Emily M. Adney, Jef D. Boeke, Oanh Le, Christian Beauséjour, Jayakrishna Ambati, Kameshwari Ambati, Matthew Simon, Andrei Seluanov, Vera Gorbunova, P. Eline Slagboom, Stephen L. Helfand, Nicola Neretti & John M. Sedivy

---

Original incorrect Fig. 1

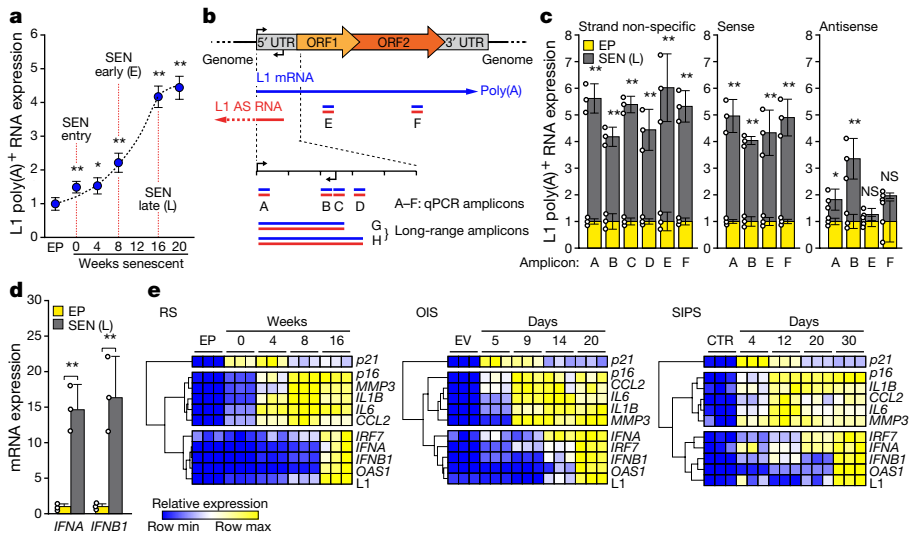

Corrected Fig. 1

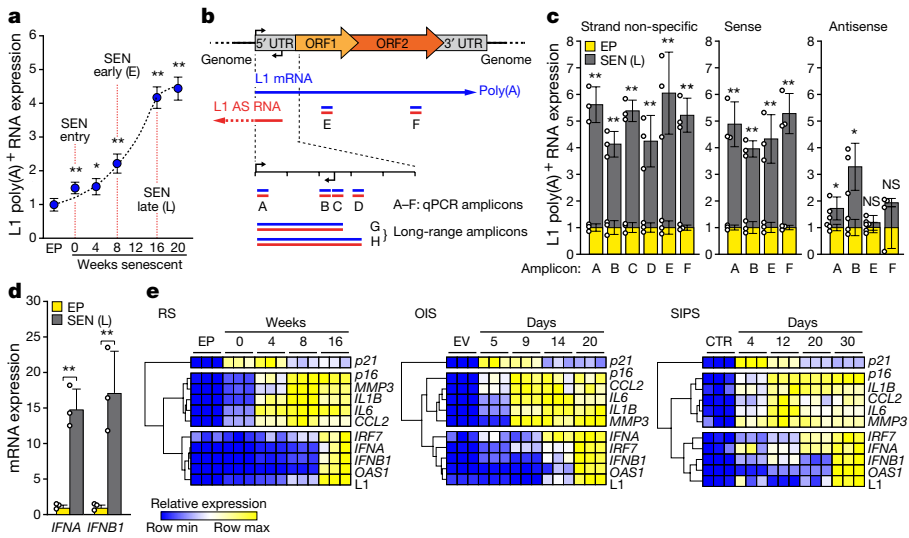

Original incorrect Fig. 2

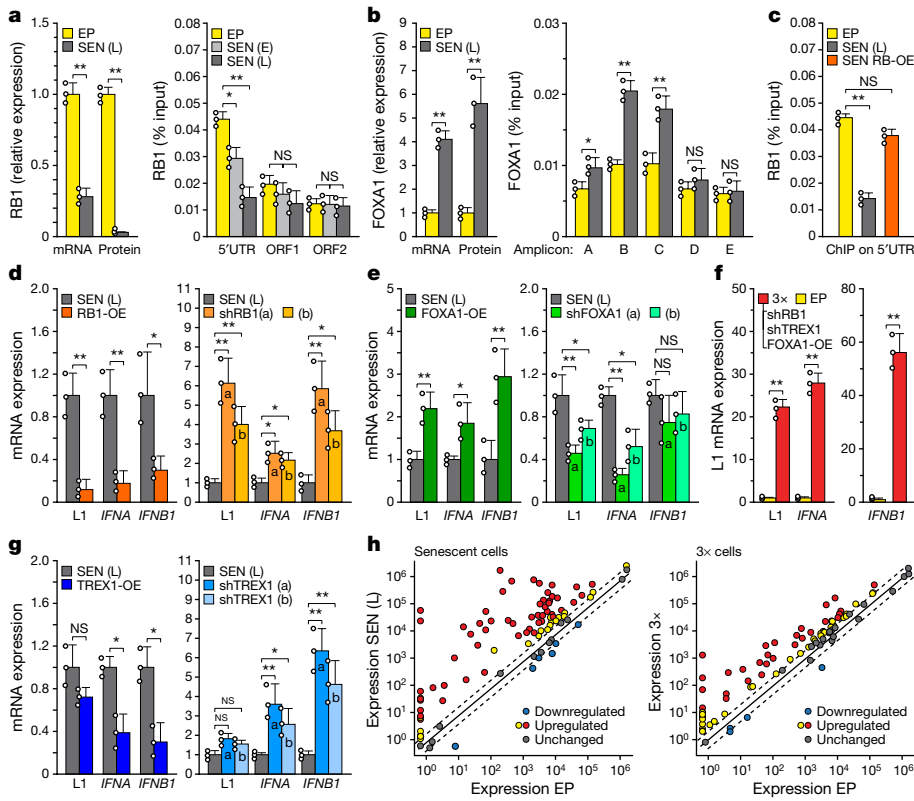

Corrected Fig. 2

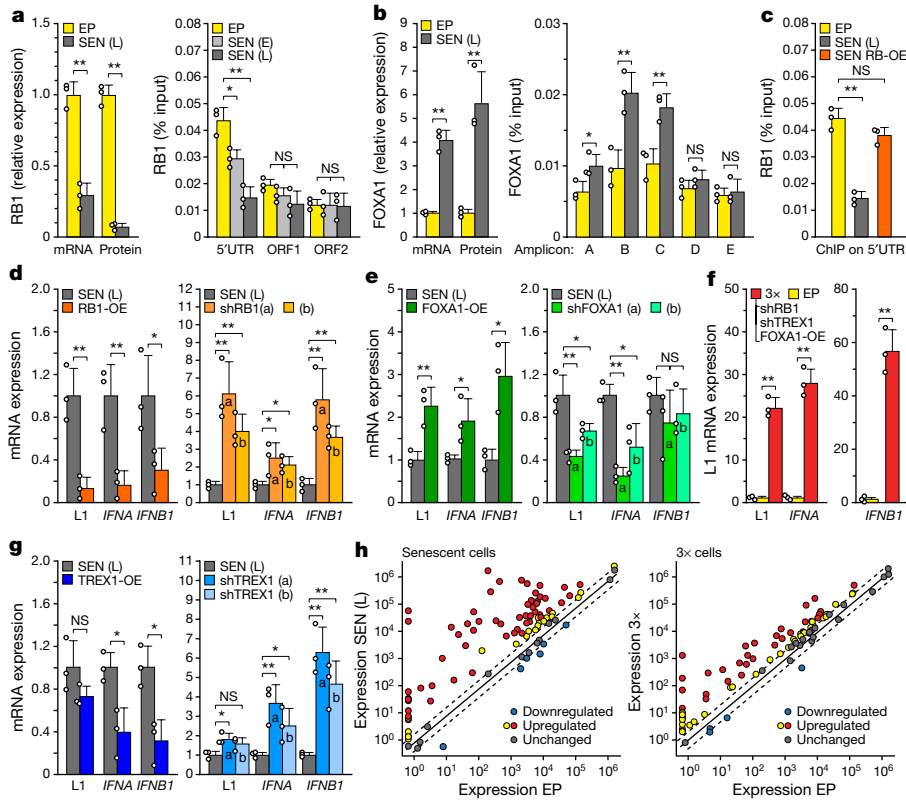

Original incorrect Fig. 3

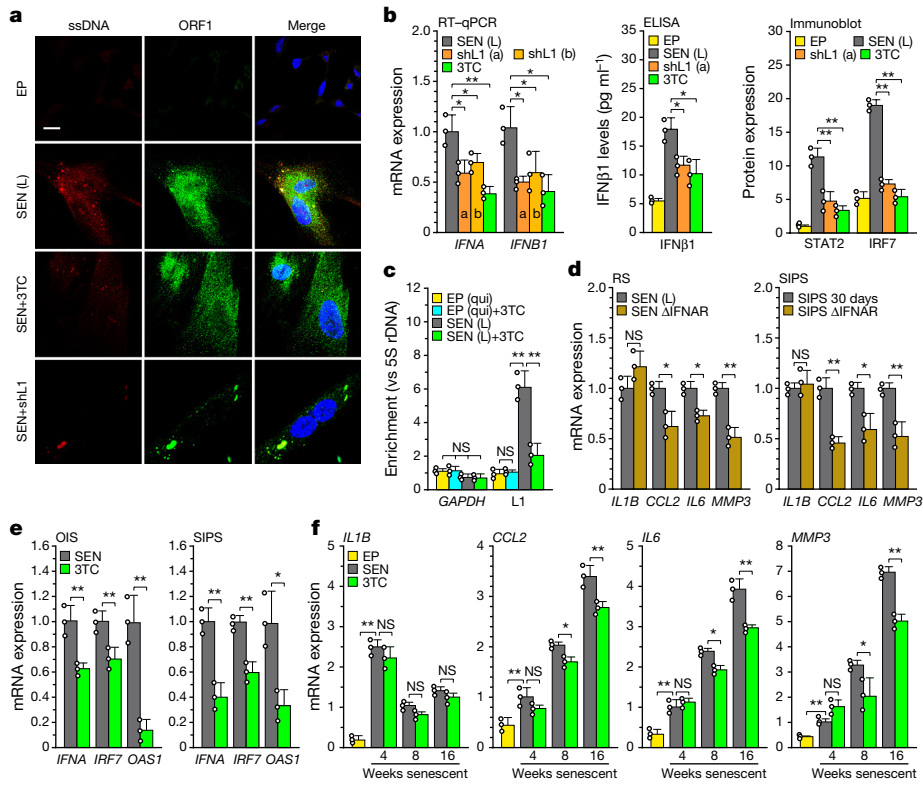

Corrected Fig. 3

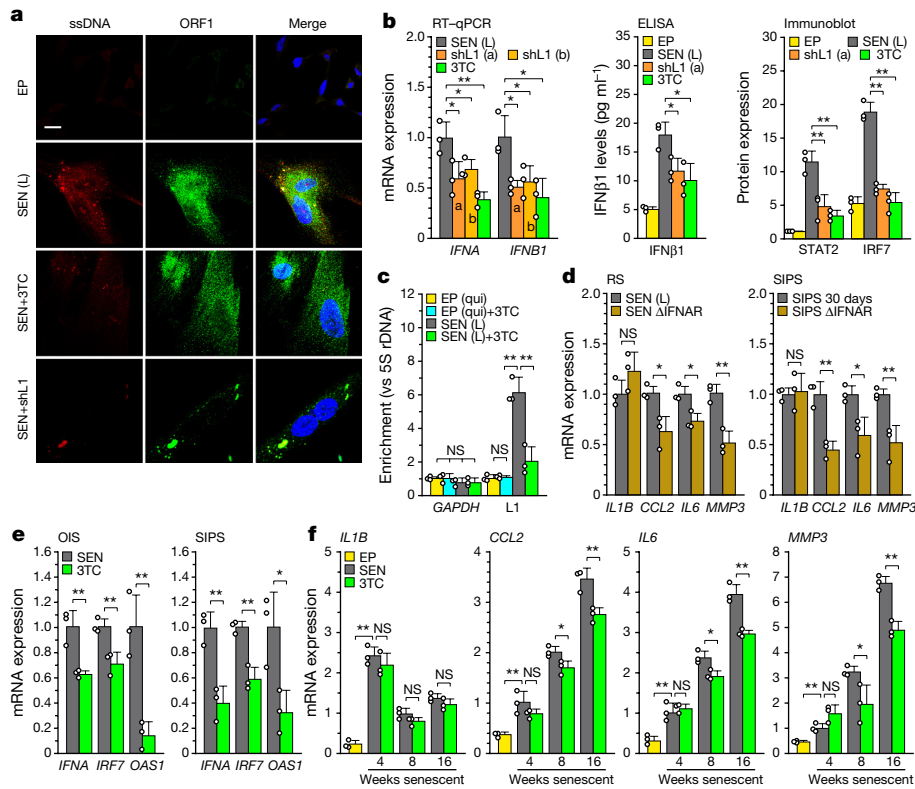

Original incorrect Extended Data Fig. 1

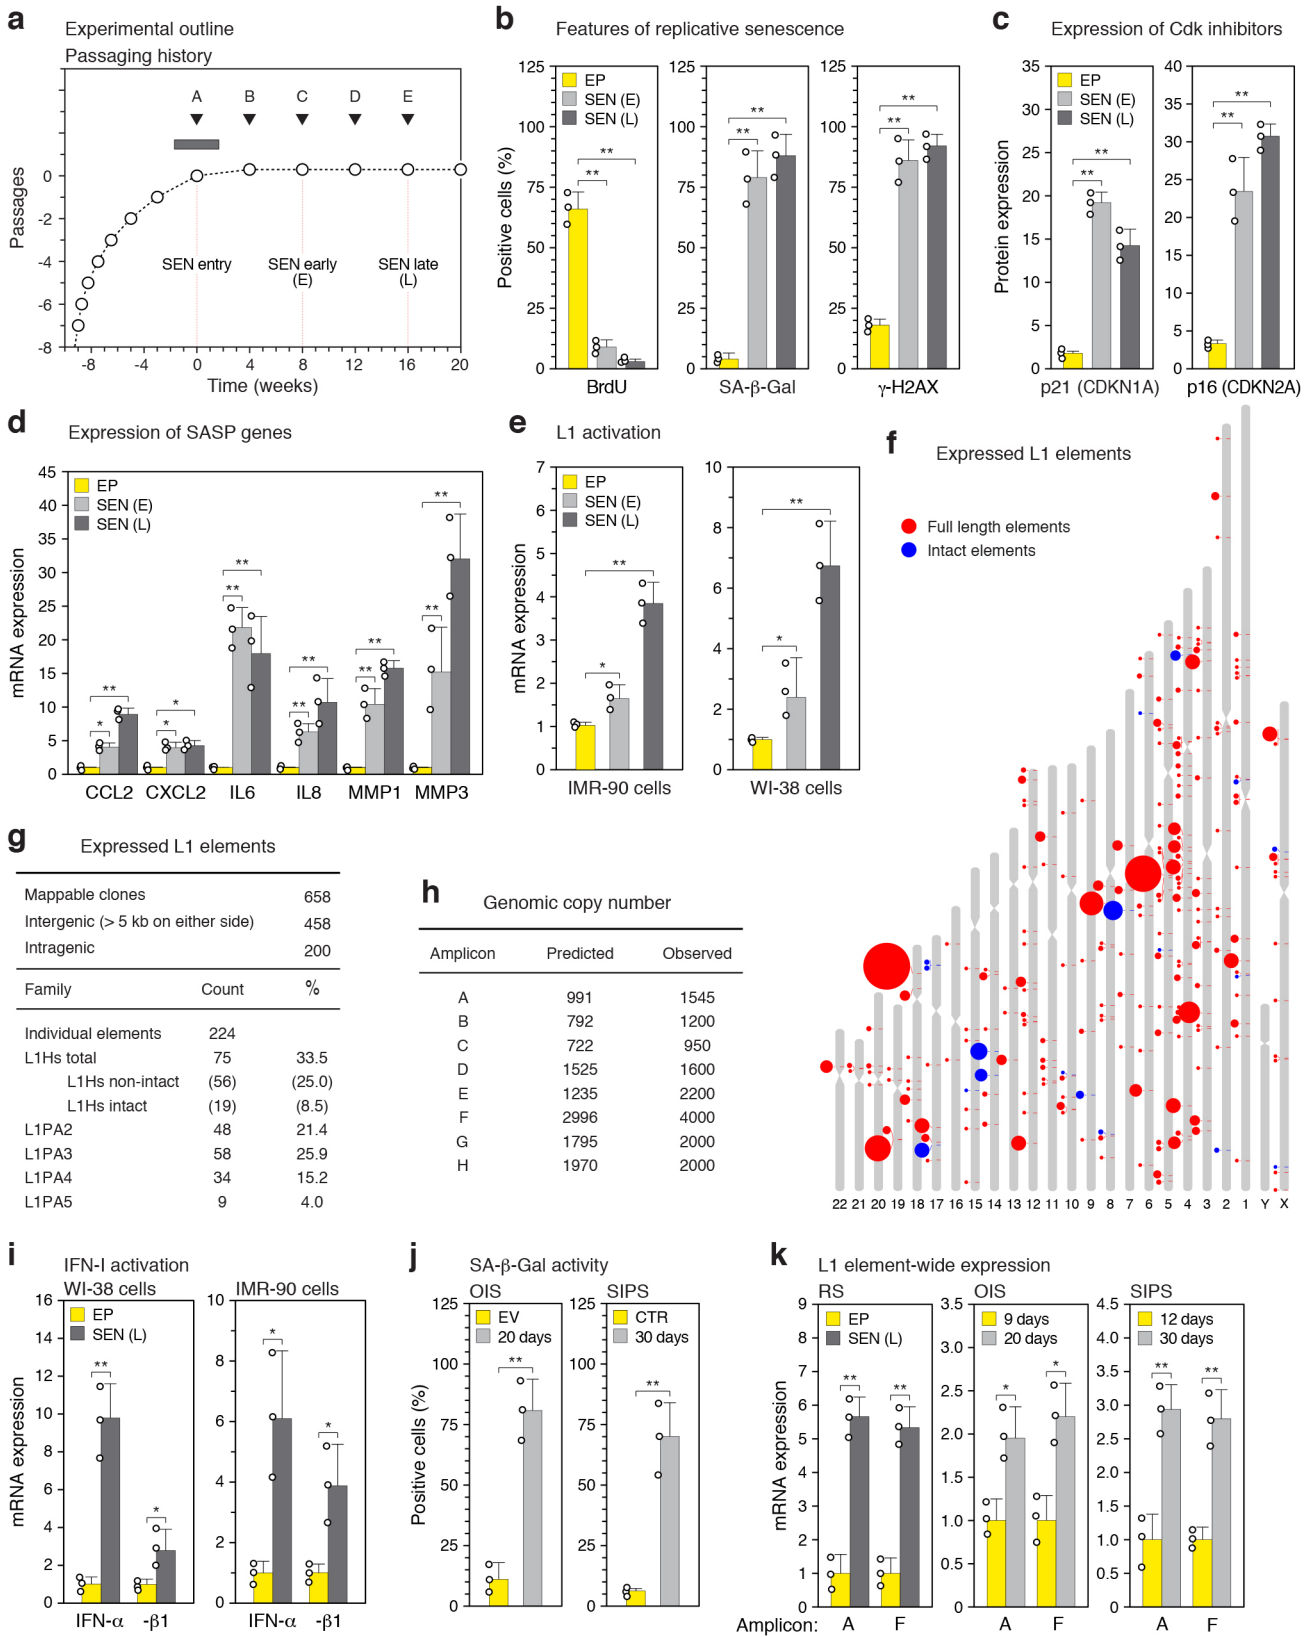

Corrected Extended Data Fig. 1

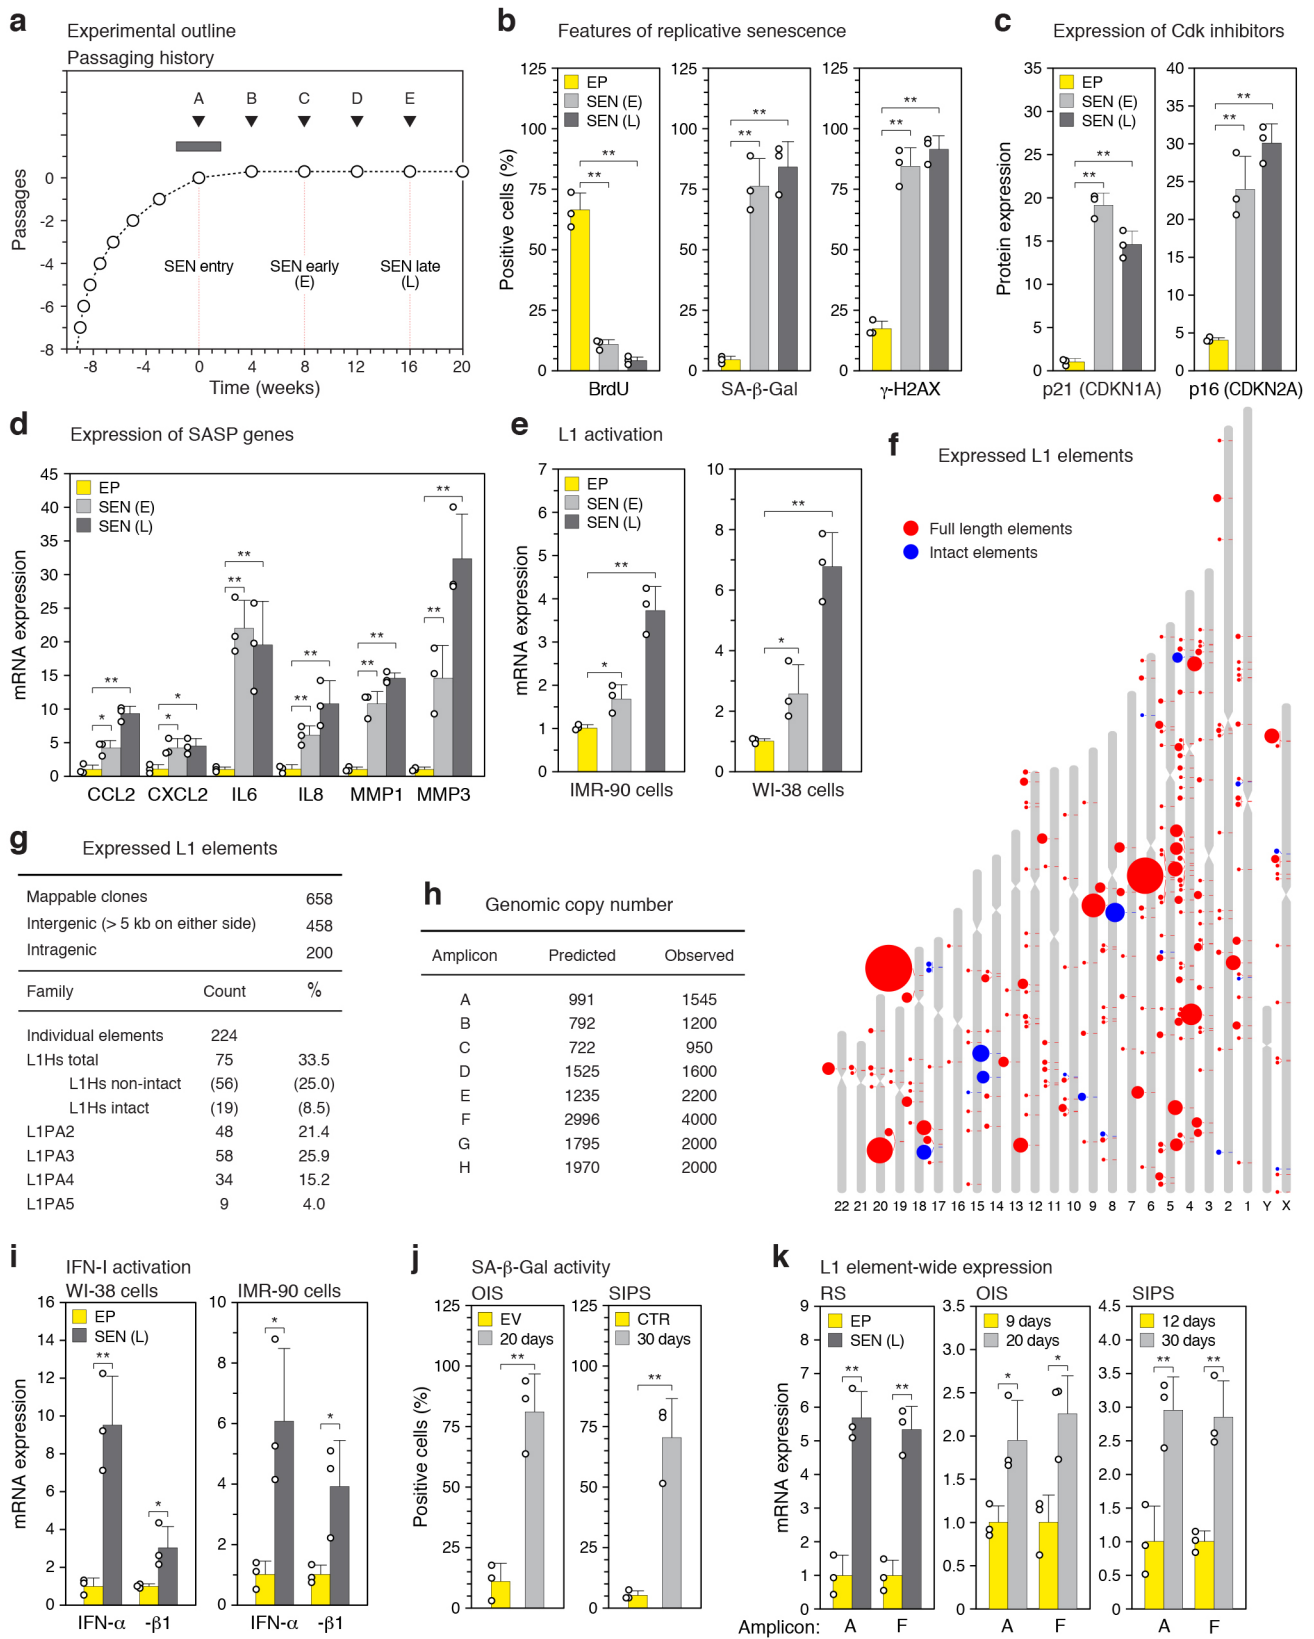

Original incorrect Extended Data Fig. 4

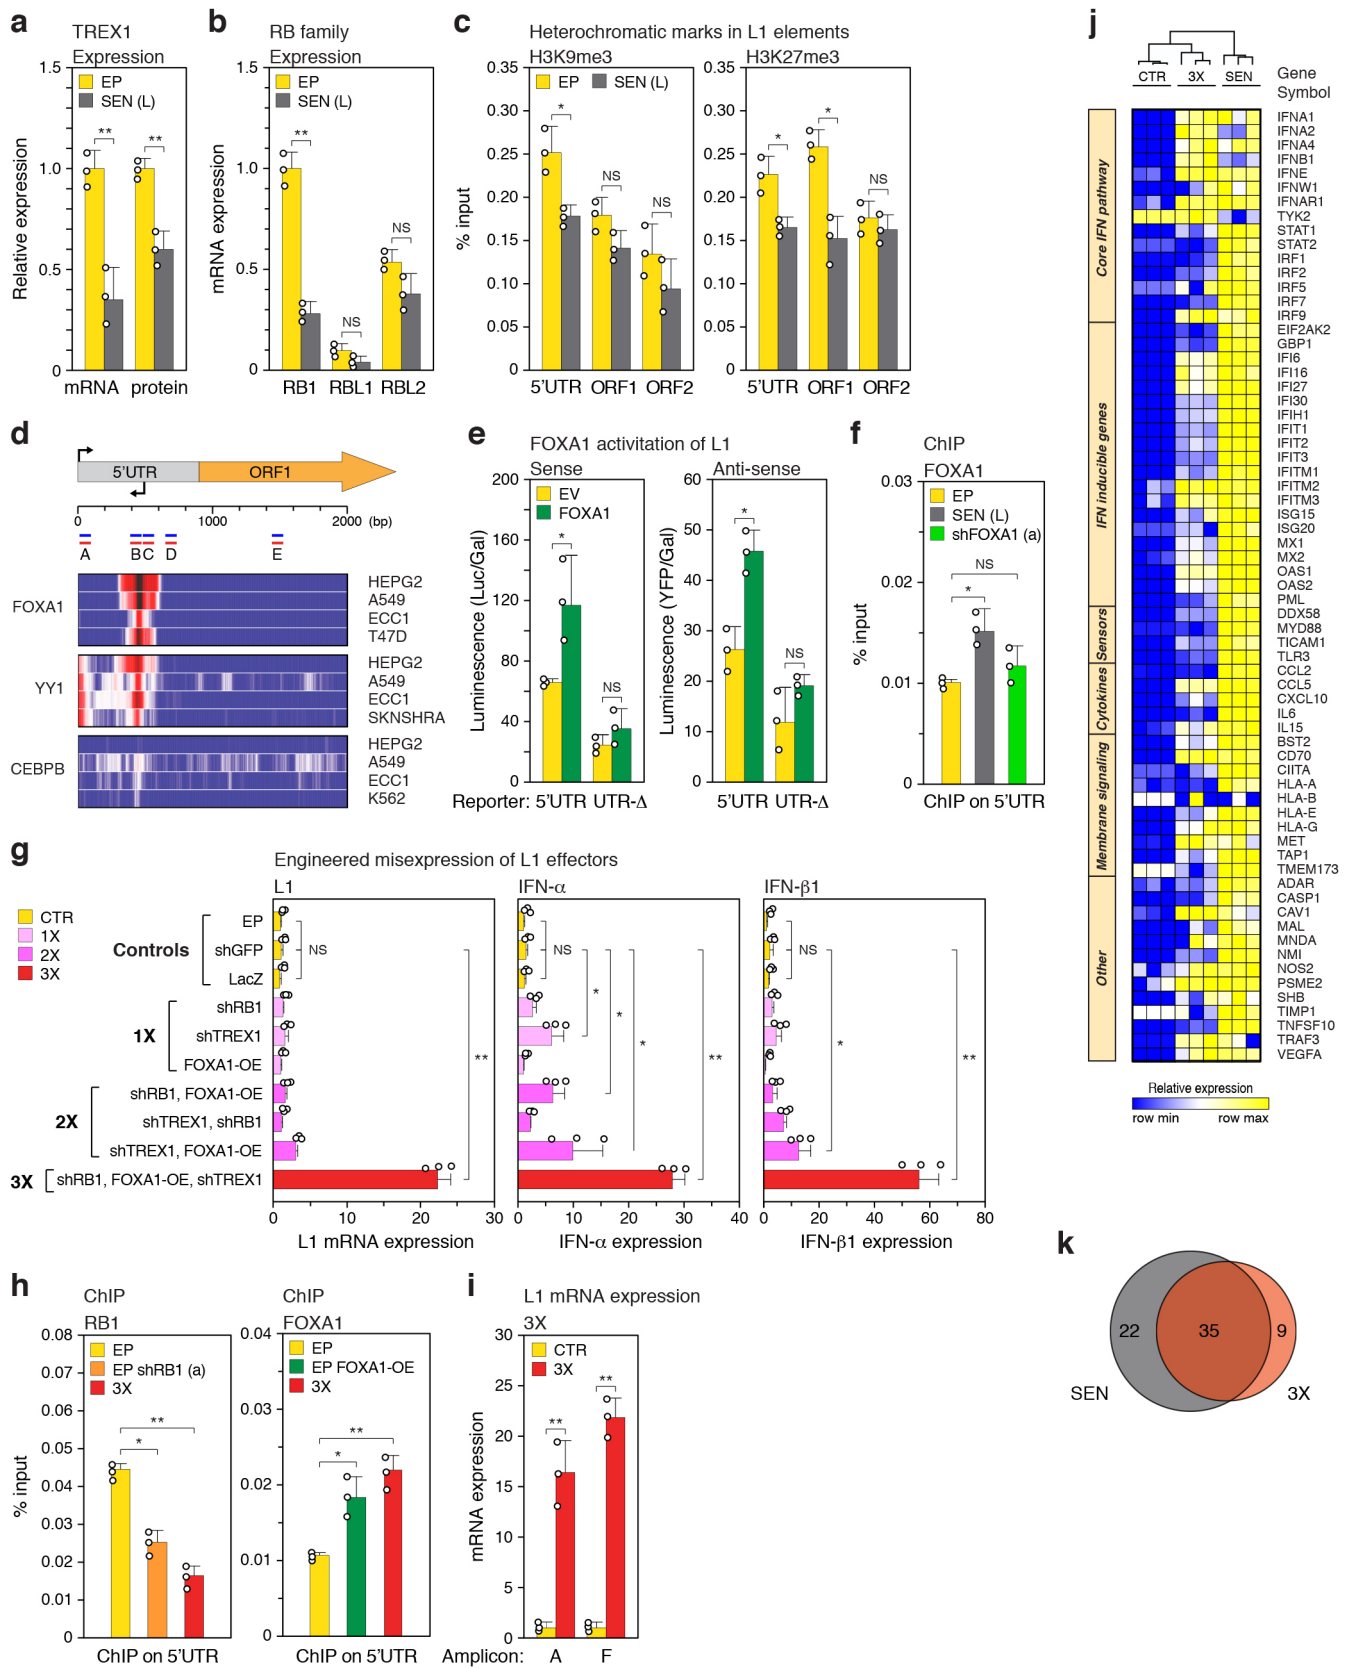

Corrected Extended Data Fig. 4

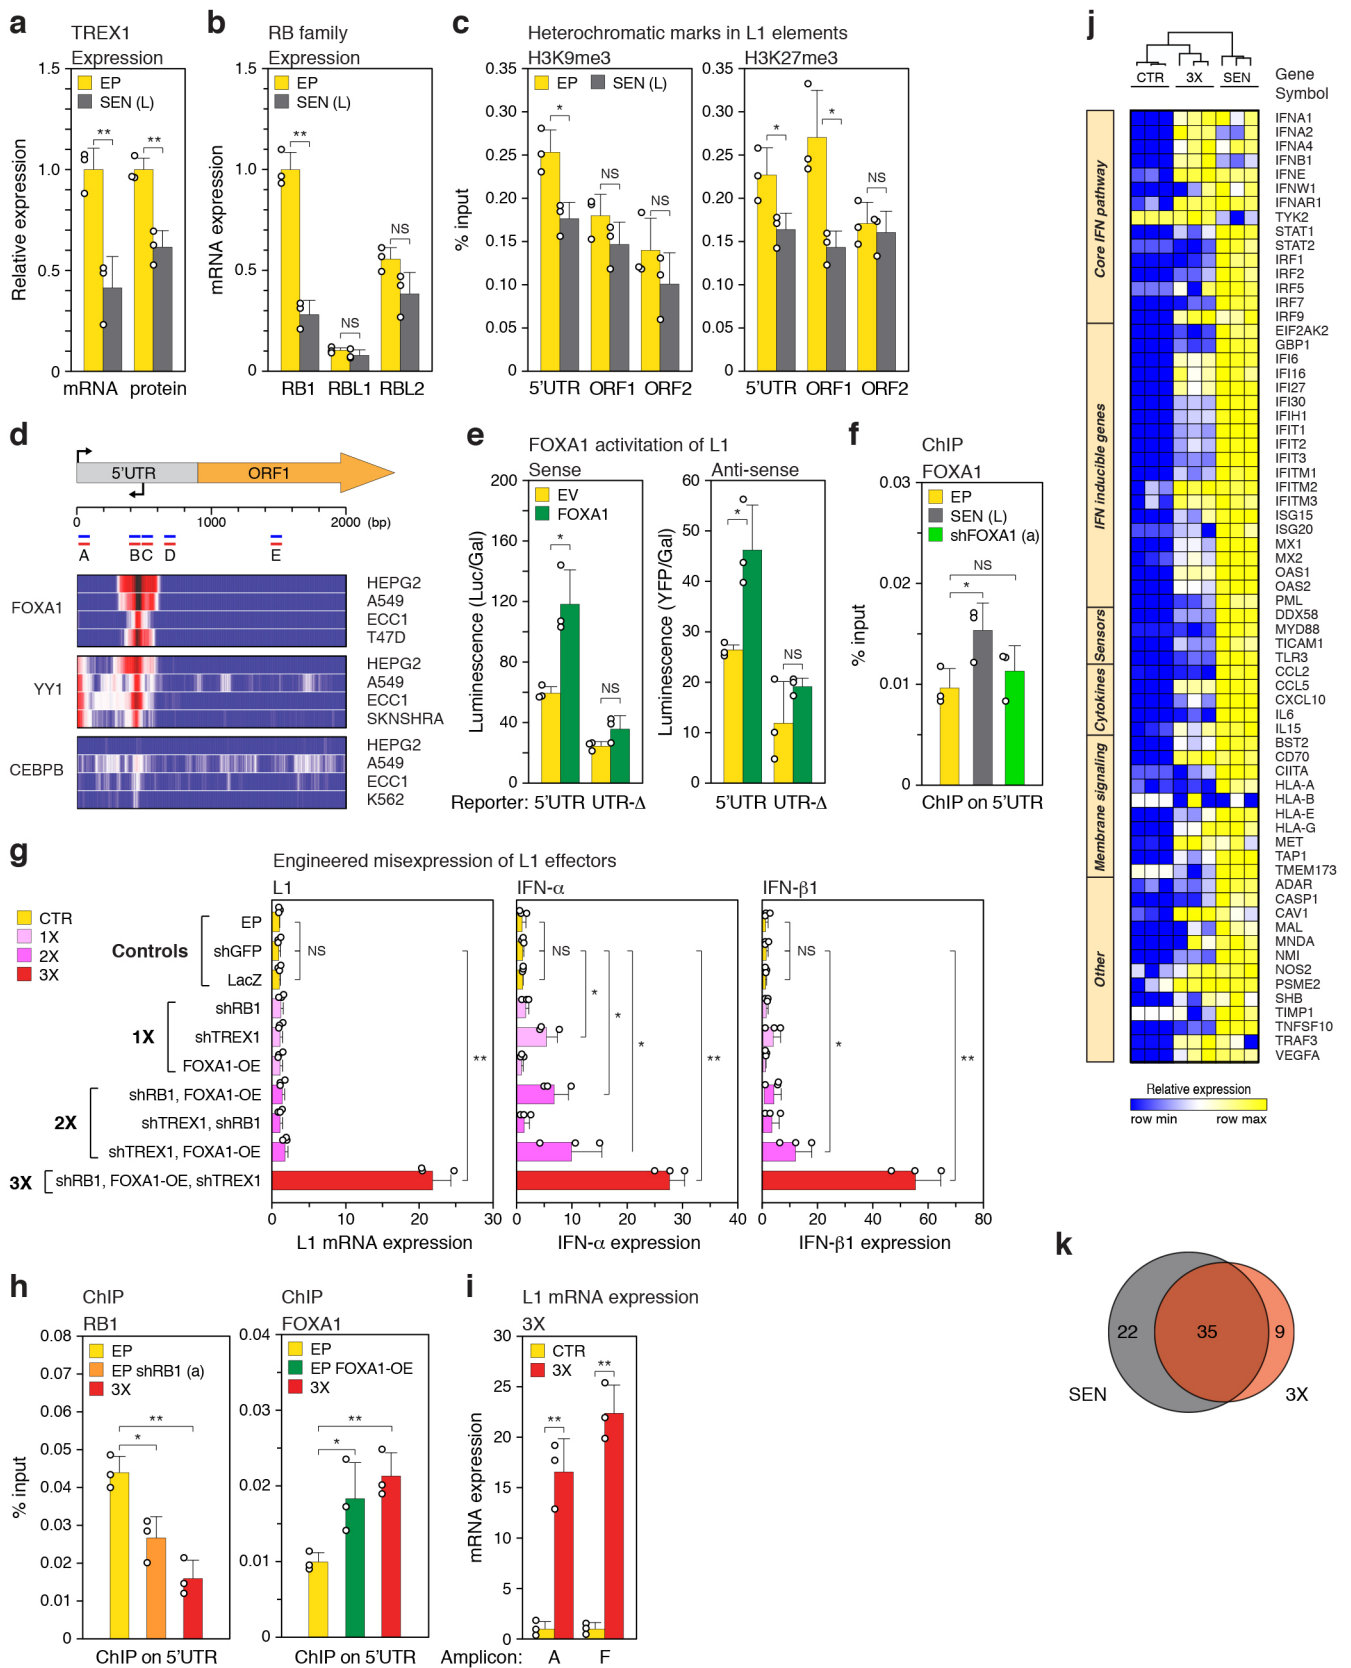



Original incorrect Extended Data Fig. 5

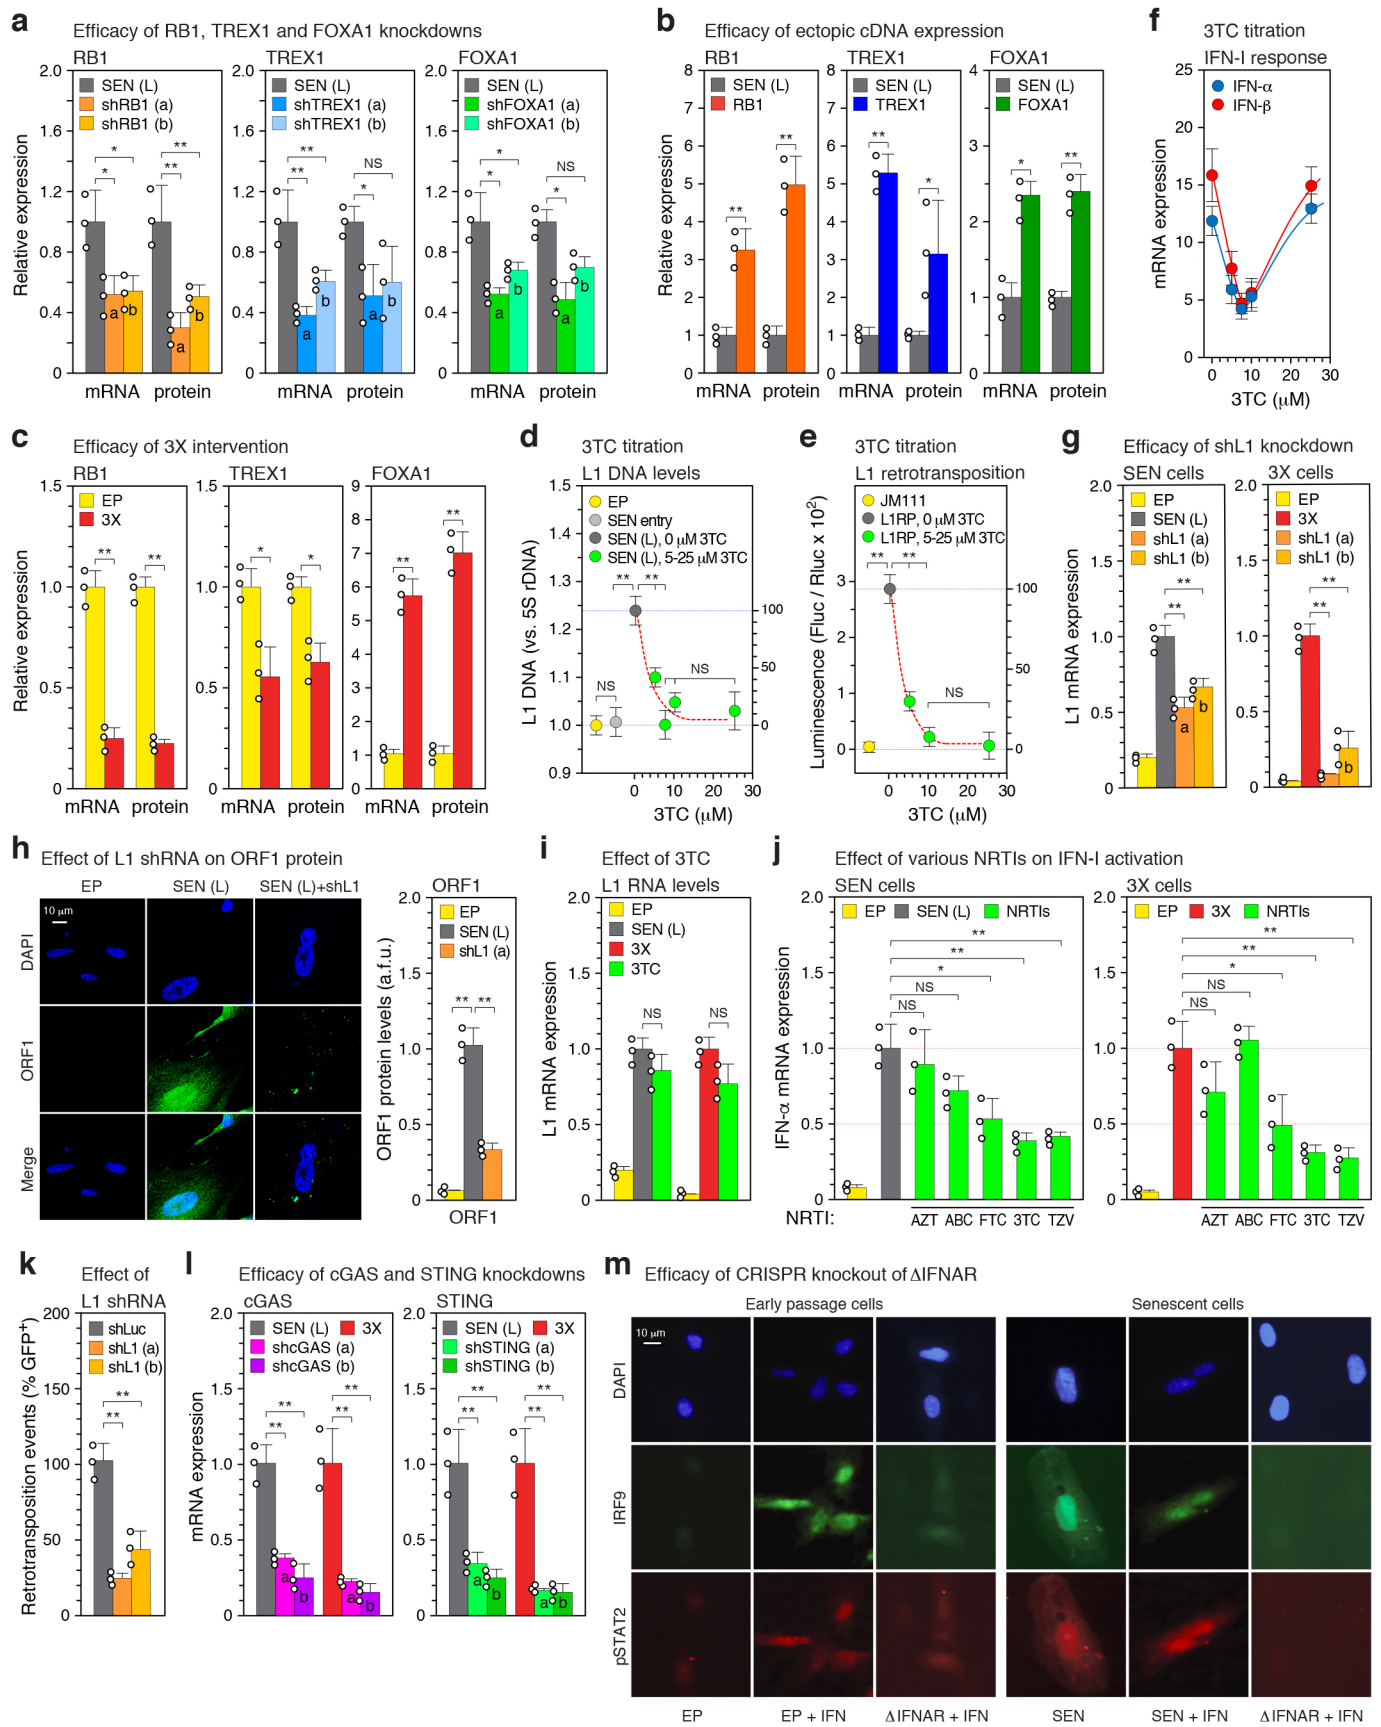

Corrected Extended Data Fig. 5

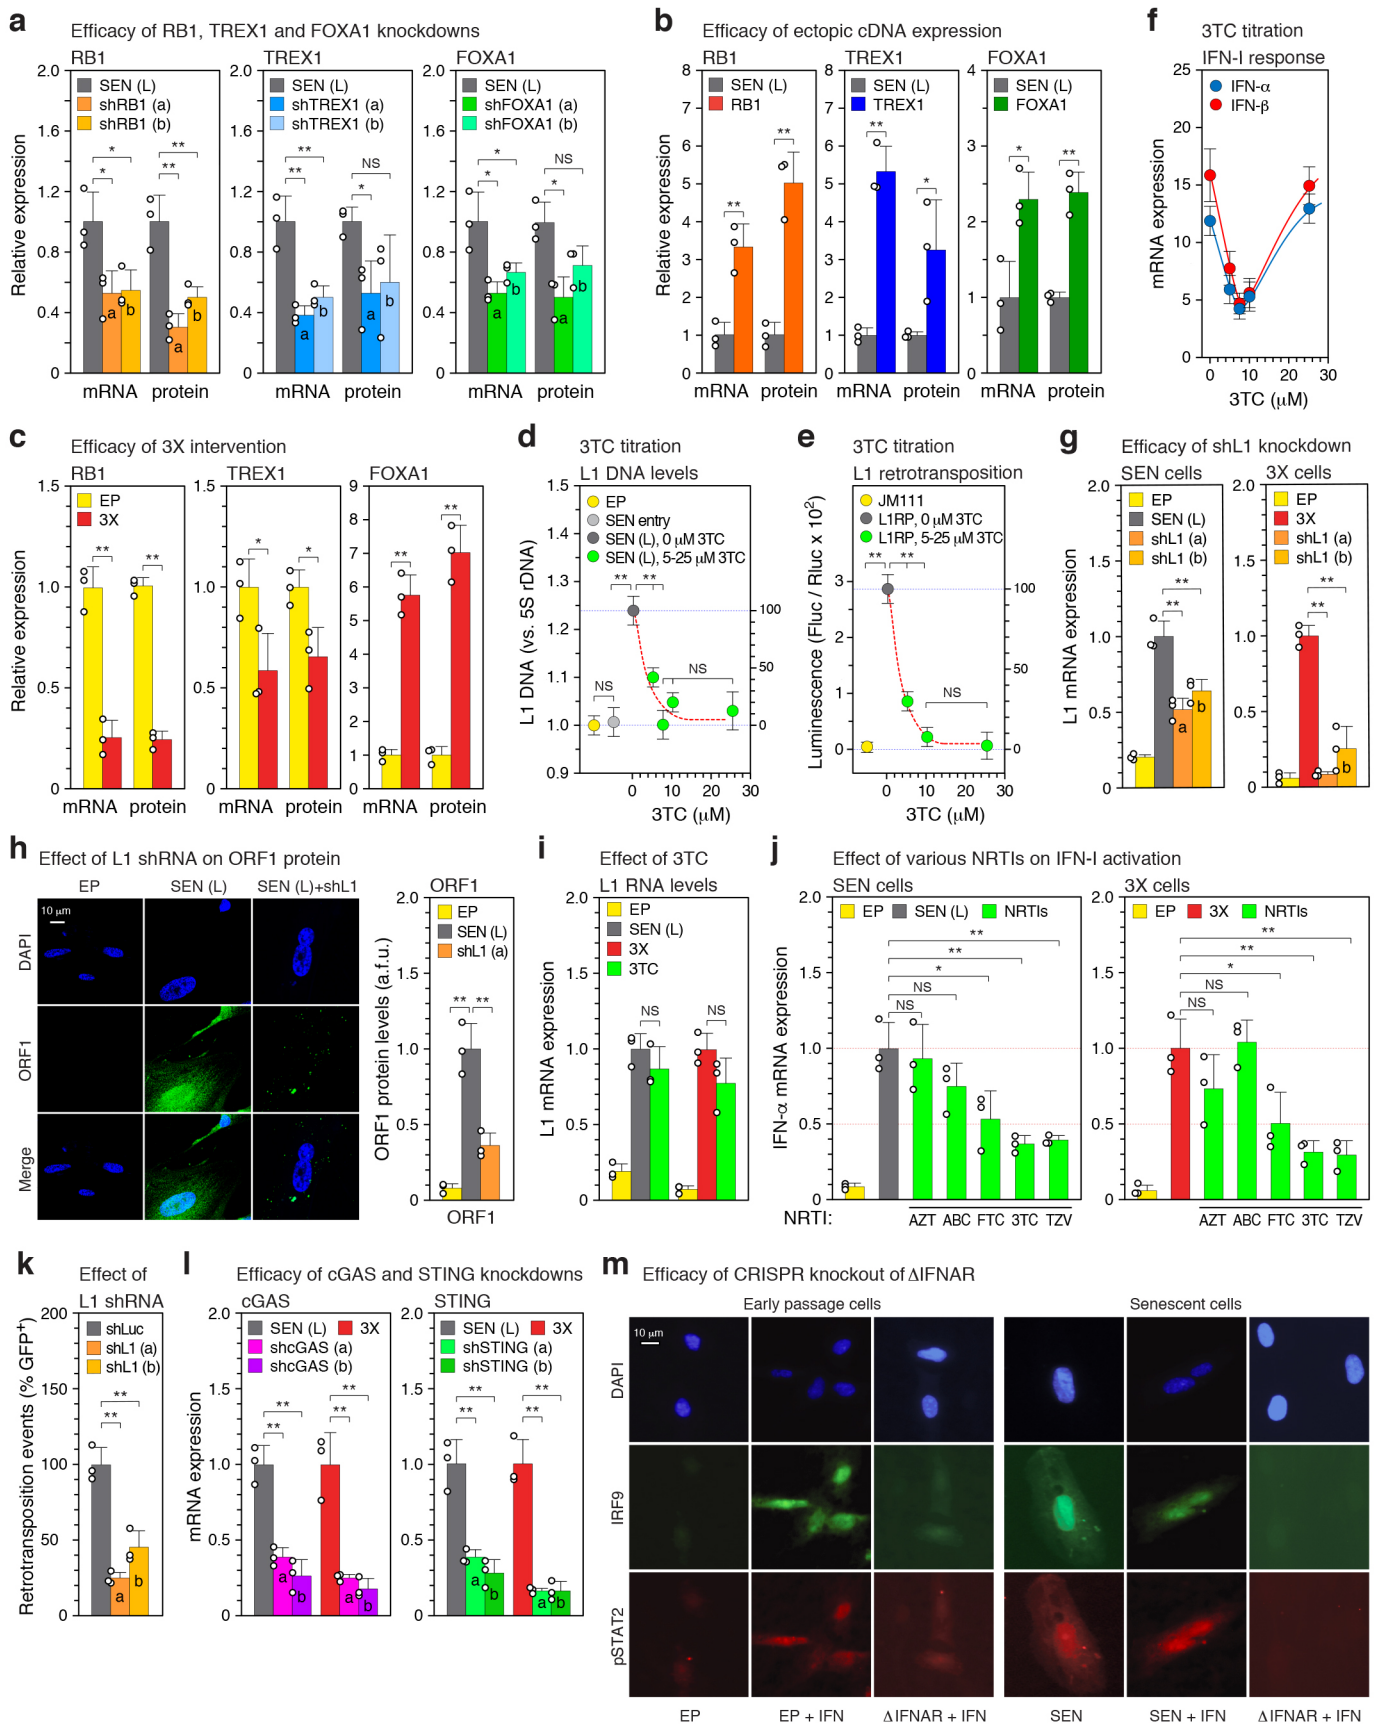

Original incorrect Extended Data Fig. 6

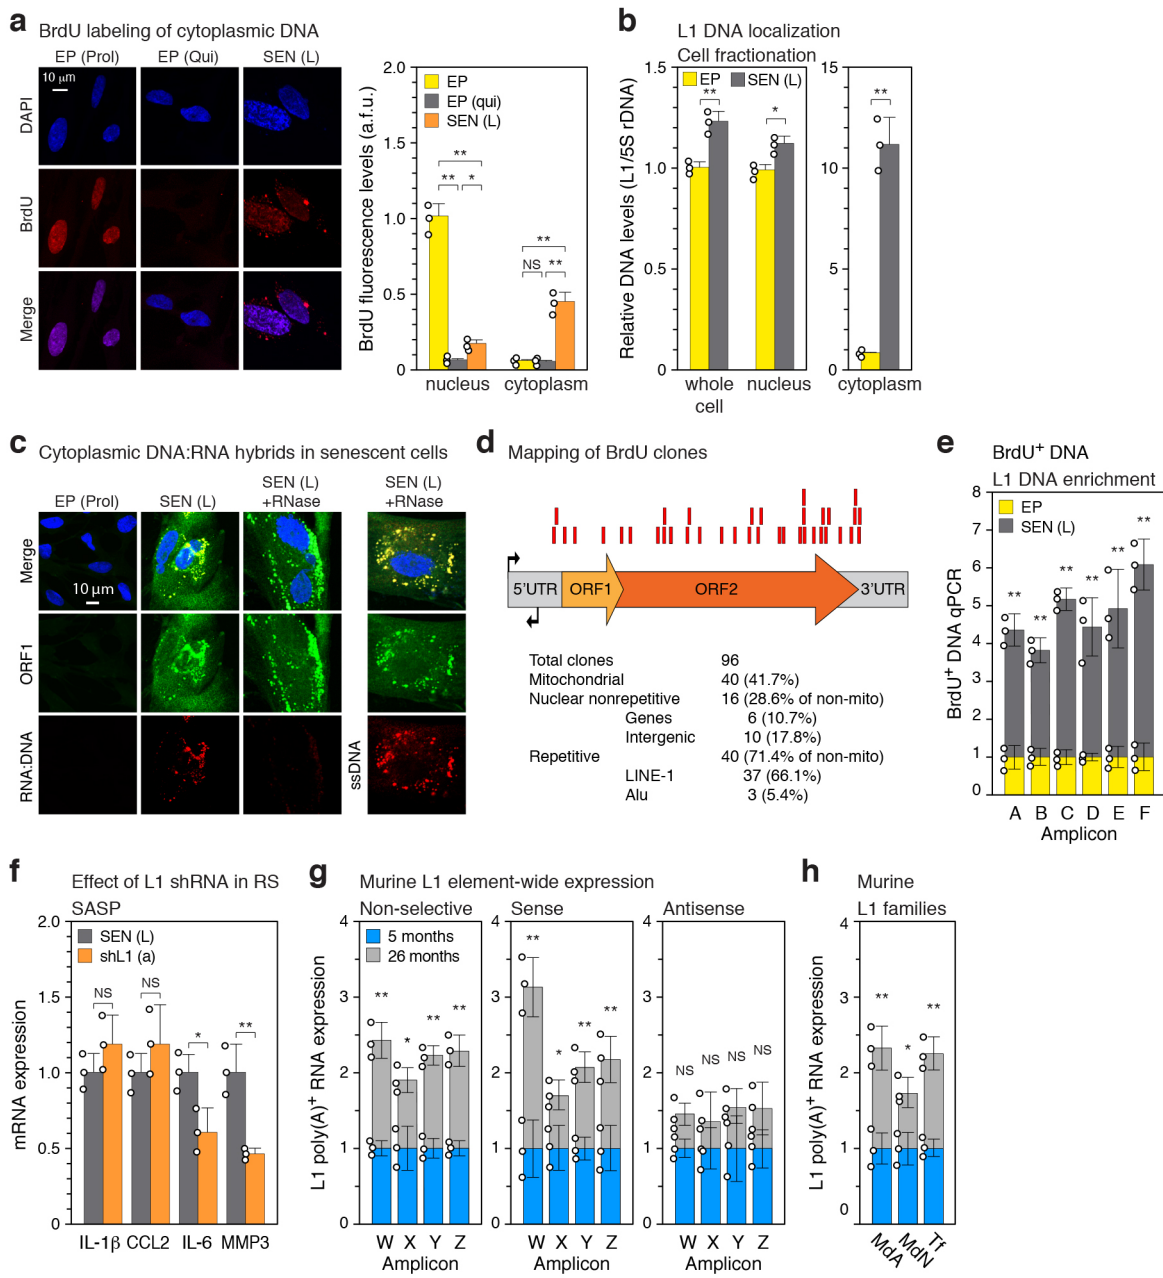

Corrected Extended Data Fig. 6

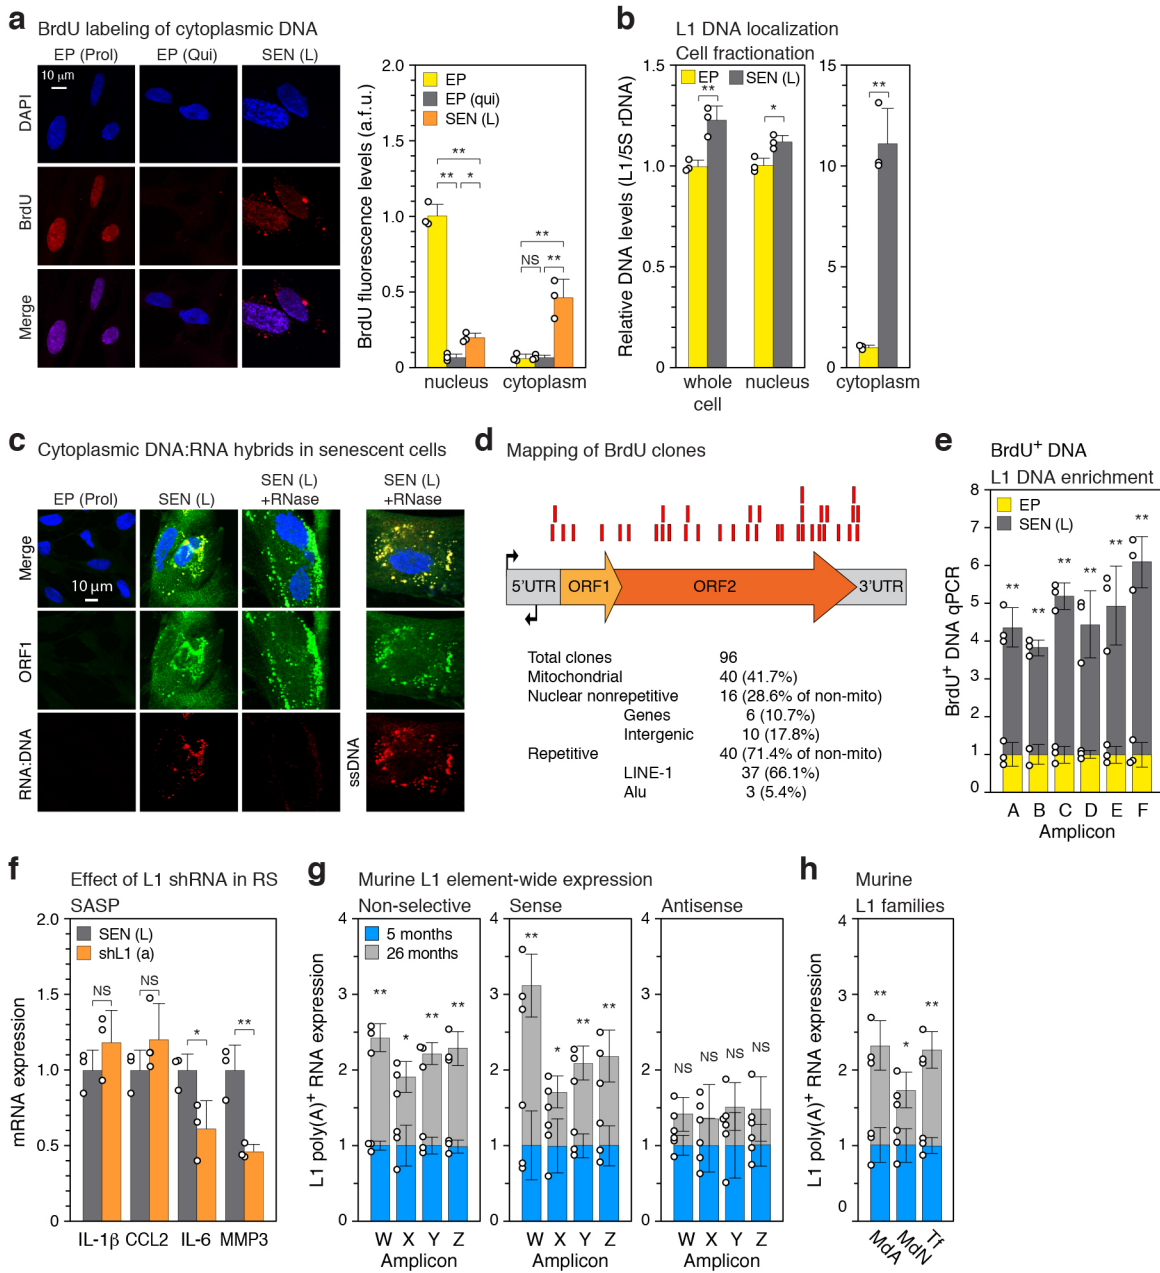

Original incorrect Extended Data Fig. 7

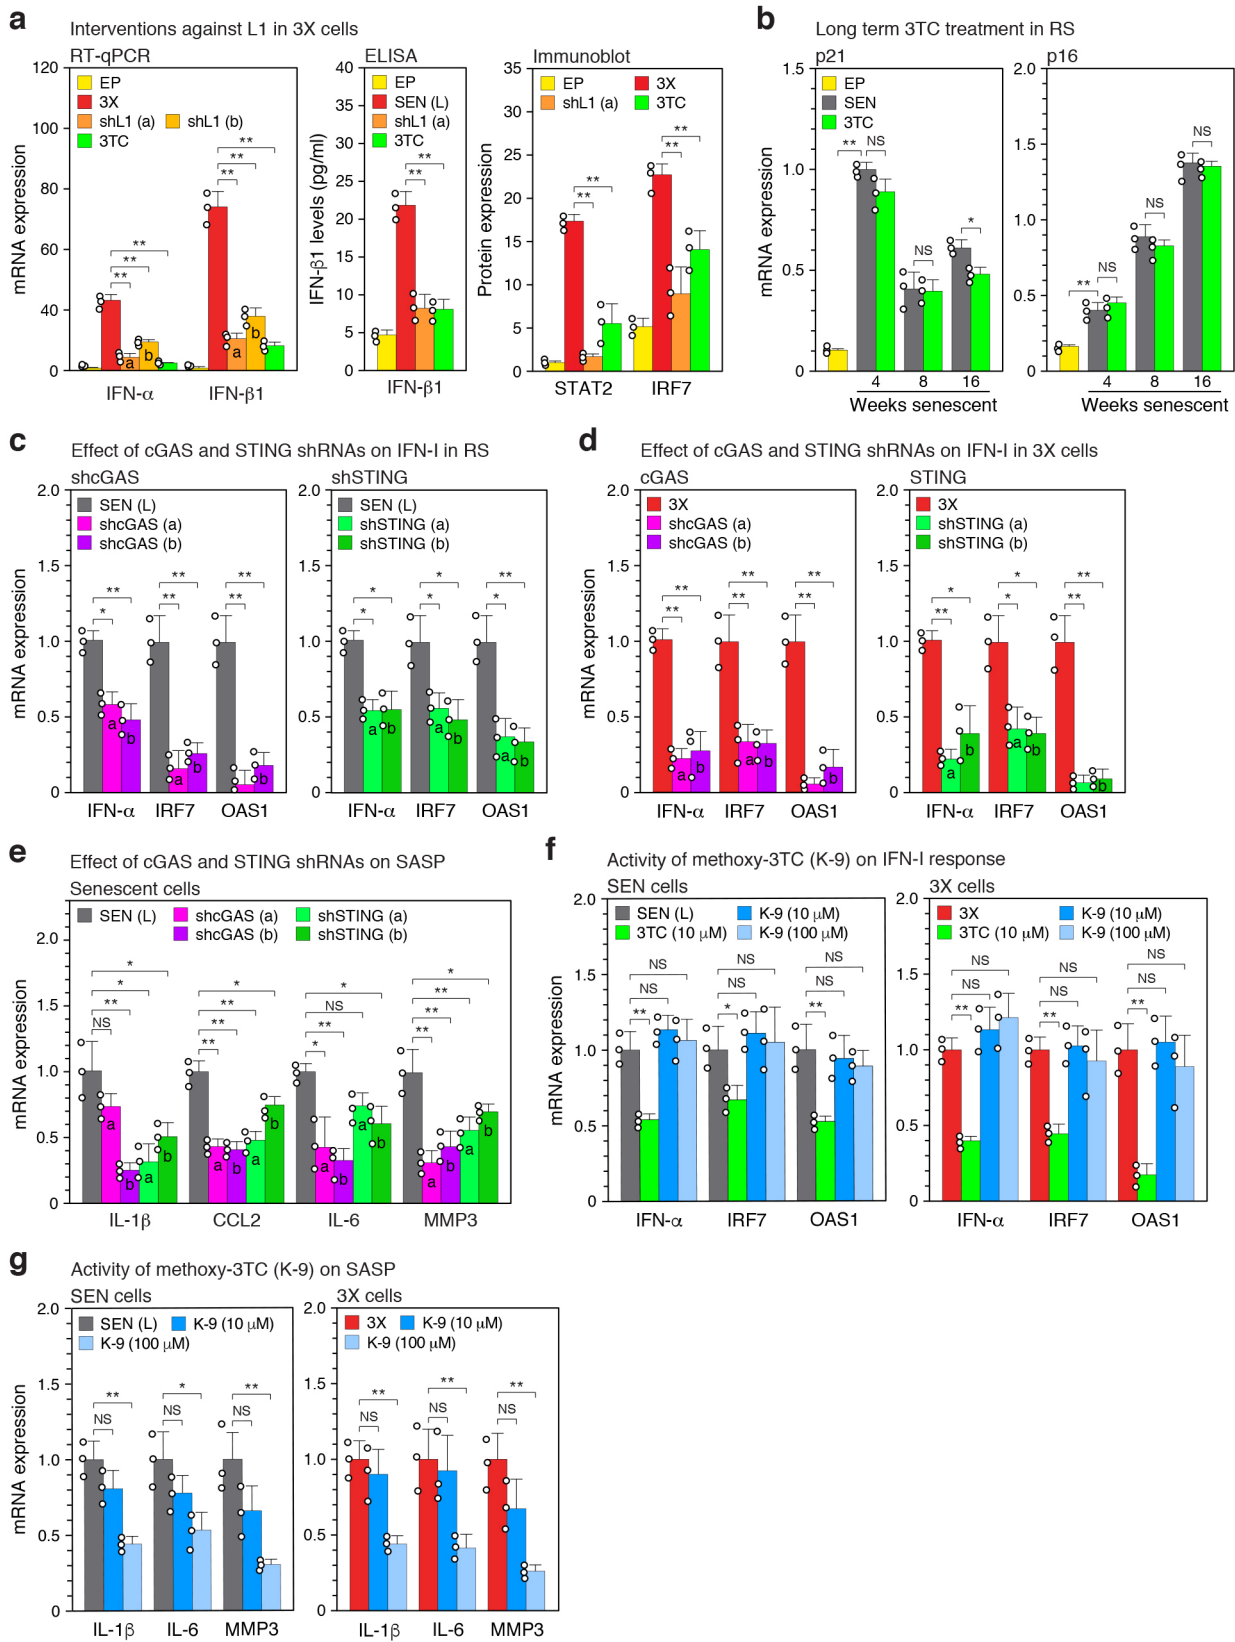

Corrected Extended Data Fig. 7

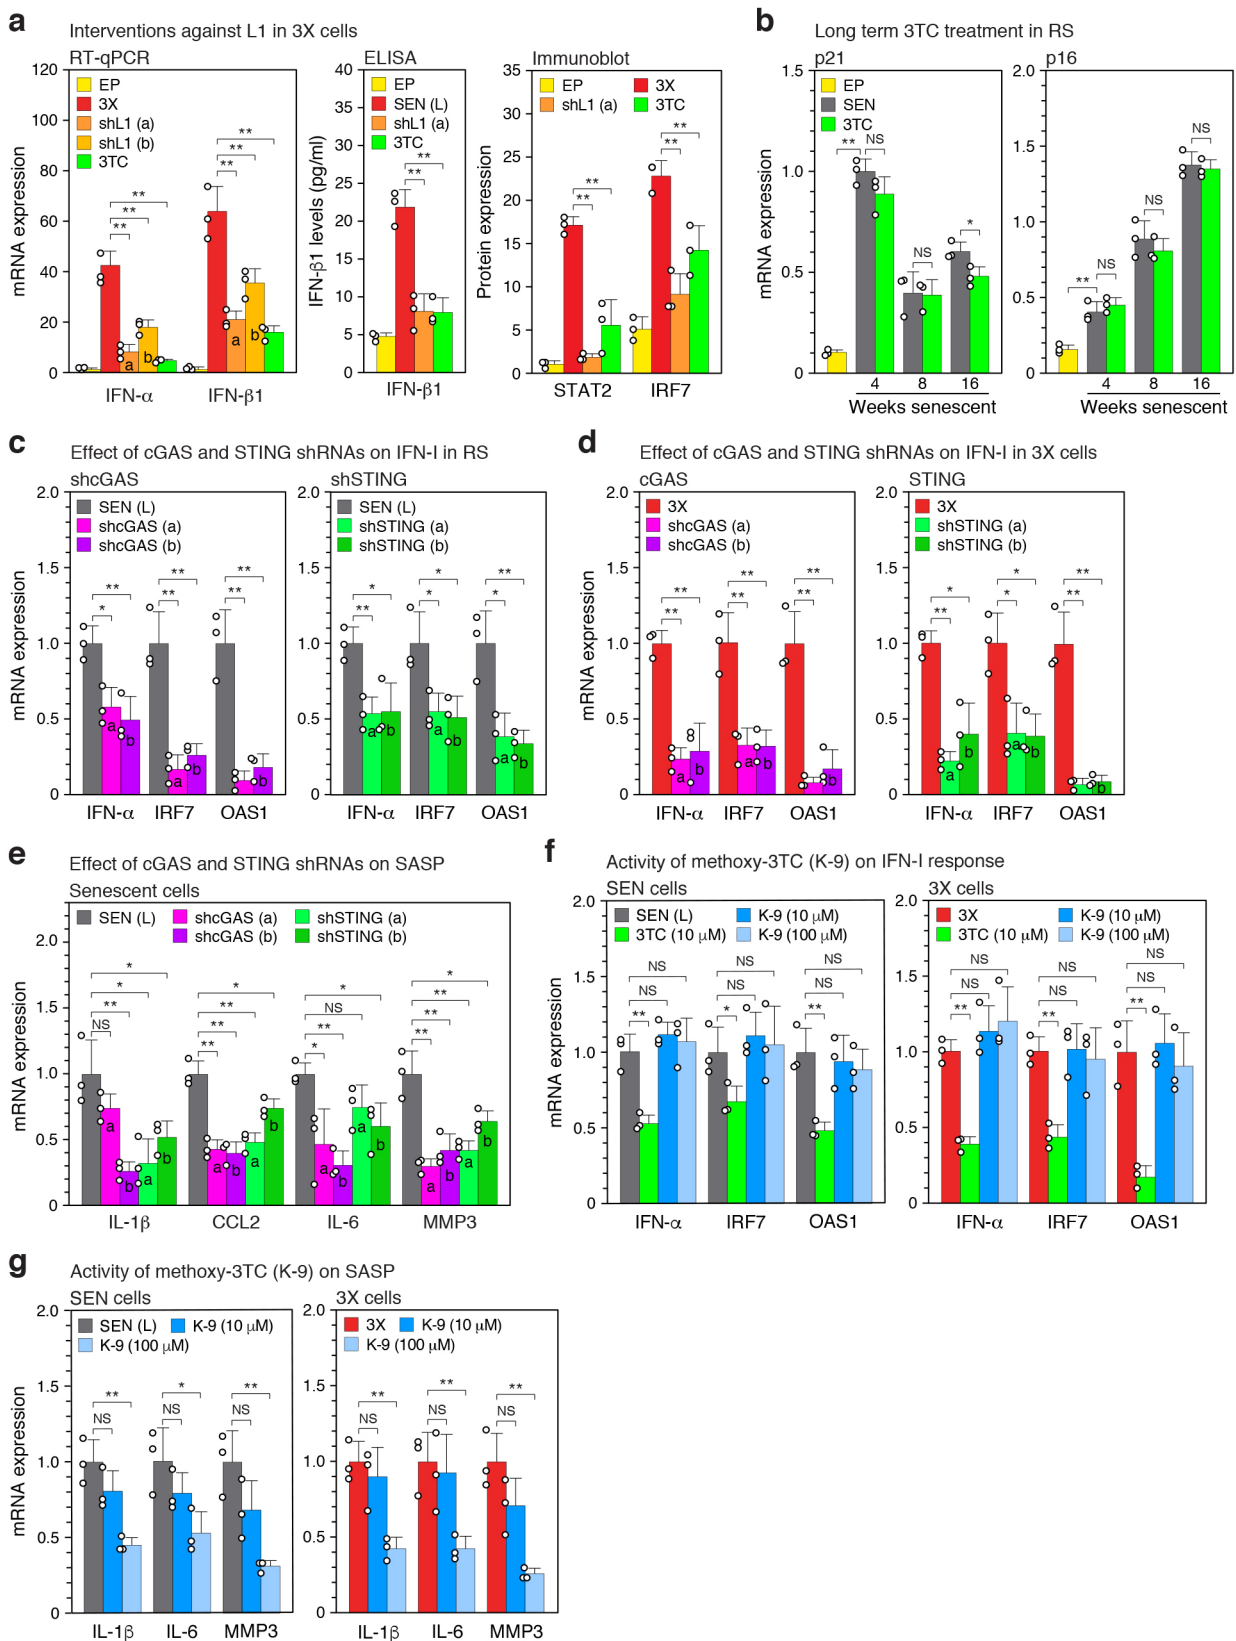

Supplement: NIHMS1069546-supplement-Supplement.pdf [file NIHMS1069546-supplement-Supplement.pdf]
